# Supplementary material for: Heavy metal pollution status and deposition history of mangrove sediments in Zhanjiang Bay, China
Source: Frontiers journal article supplement (doi:10.3389/fmars.2022.989584), 2022-09-05
Supplement: Data_Sheet_1.docx [file Data_Sheet_1.docx]

**Supplementary data**

**Heavy metal pollution status and sedimentation history of mangrove sediments in Zhanjiang Bay, China**

Daobin Tang1,2,3, Songying Luo1,4*, Suyan Deng1, Rui Huang1, Bishan Chen1, and Ziyi Deng1,

1School of Geographical Sciences, Lingnan Normal University, Zhanjiang, China

2College of Geography and Environment Science, Northwest Normal University, Lanzhou, China

3Key Laboratory of Resource Environment and Sustainable Development of Oasis, Gansu Province, China

4Mangrove Institute, Lingnan Normal University, Zhanjiang, China

*****Correspondence: luosongying@163.com

Table S1 Pearson correlation between heavy metals and reference element in the sedimentary cores

|  | Al | Fe | Ti | Zr | Cu | Pb | Cr | Zn | Hg | Co |
| --- | --- | --- | --- | --- | --- | --- | --- | --- | --- | --- |
| Al | 1 |  |  |  |  |  |  |  |  |  |
| Fe | 0.33 | 1 |  |  |  |  |  |  |  |  |
| Ti | 0.40* | 0.87** | 1 |  |  |  |  |  |  |  |
| Zr | -0.11 | -0.67 | -0.75 | 1 |  |  |  |  |  |  |
| Cu | 0.46* | 0.67** | 0.38* | -0.07 | 1 |  |  |  |  |  |
| Pb | 0.40* | 0.87** | 0.86** | -0.65 | 0.61** | 1 |  |  |  |  |
| Cr | 0.24 | 0.85** | 0.94** | -0.84 | 0.31 | 0.79** | 1 |  |  |  |
| Zn | 0.34 | 0.97** | 0.75** | -0.51 | 0.79** | 0.84** | 0.72** | 1 |  |  |
| Hg | -0.34 | -0.32 | -0.26 | 0.00 | -0.40 | -0.20 | -0.18 | -0.31 | 1 |  |
| Co | 0.19 | 0.97** | 0.81** | -0.62 | 0.64** | 0.80** | 0.82** | 0.96** | -0.26 | 1 |

Table S2 Determination of heavy metals (μg·g-1) and sediment age in core C1

| Depth (cm) | Cu | Pb | Cr | Ni | Zn | Cd | Hg | Co | Year |
| --- | --- | --- | --- | --- | --- | --- | --- | --- | --- |
| 0-5 | 12.7 | 18 | 37 | 12.3 | 39.9 | 0.16 | 0.104 | 6.3 | 2017-2008 |
| 5-10 | 15.4 | 26 | 49 | 14.9 | 50.7 | 0.25 | 0.025 | 8 | 2008-1999 |
| 10-15 | 14.9 | 25 | 49 | 10.3 | 48.4 | 0.09 | 0.032 | 9.2 | 1999-1981 |
| 15-20 | 16.1 | 28 | 60 | 16.3 | 53.4 | 0.18 | 0.023 | 10.4 | 1981-1972 |
| 20-25 | 15.6 | 28 | 57 | 15 | 53.9 | 0.2 | 0.036 | 9.9 | 1972-1963 |
| 25-30 | 16.0 | 31 | 55 | 15.1 | 53.4 | 0.349 | 0.031 | 9.5 | 1963-1954 |
| 30-35 | 17.8 | 32 | 63 | 13.9 | 60.4 | 0.245 | 0.02 | 11.5 | 1954-1945 |
| 35-40 | 17.5 | 30 | 58 | 12.1 | 58.3 | 0.093 | 0.026 | 12.2 | 1945-1936 |
| 40-45 | 14.8 | 27 | 52 | 17.3 | 47.9 | 0.075 | 0.039 | 8.8 | 1936-1927 |
| 45-50 | 13.6 | 24 | 44 | 14.3 | 42.6 | 0.19 | 0.108 | 8.1 | 1927-1918 |
| 50-55 | 13.4 | 25 | 50 | 12.2 | 47.6 | 0.086 | 0.1 | 8.7 | 1918-1909 |
| 55-60 | 15.9 | 33 | 62 | 11.9 | 66.6 | 0.095 | 0.342 | 13.7 | 1909-1900 |

Table S3 Determination of heavy metals (μg·g-1) and sediment age in core C2

| Depth (cm) | Cu | Pb | Cr | Zn | Hg | Co | Year |
| --- | --- | --- | --- | --- | --- | --- | --- |
| 0-5 | 14.2 | 14 | 34 | 35.6 | 0.166 | 5.7 | 2017-2011 |
| 5-10 | 16.9 | 20 | 44 | 45.7 | 0.034 | 8 | 2011-2005 |
| 10-15 | 14.6 | 23 | 51 | 46 | 0.131 | 8.2 | 2005-1999 |
| 15-20 | 16.6 | 31 | 56 | 59.5 | 0.032 | 11.6 | 1999-1993 |
| 20-25 | 14.4 | 25 | 53 | 51.4 | 0.031 | 10.1 | 1993-1987 |
| 25-30 | 14.8 | 30 | 59 | 59.8 | 0.023 | 12.2 | 1987-1981 |
| 30-35 | 18.4 | 31 | 66 | 70.4 | 0.184 | 14.7 | 1981-1975 |
| 35-40 | 17.1 | 35 | 68 | 78.1 | 0.006 | 17.6 | 1975-1969 |
| 40-45 | 19.5 | 35 | 72 | 80.5 | 0.01 | 20.5 | 1969-1963 |
| 45-50 | 17.4 | 34 | 73 | 84.4 | 0.199 | 21.4 | 1963-1957 |
| 50-55 | 16.3 | 32 | 70 | 76 | 0.019 | 19.9 | 1957-1951 |
| 55-60 | 11.9 | 26 | 64 | 62.6 | 0 | 13.9 | 1951-1945 |
| 60-65 | 13.4 | 32 | 69 | 73.5 | 0.018 | 16.8 | 1945-1939 |
| 65-70 | 13 | 23 | 64 | 55.6 | 0.007 | 12.8 | 1939-1933 |
| 70-75 | 10.3 | 20 | 55 | 34.1 | 0.223 | 7.4 | 1933-1927 |
| 75-80 | 9.9 | 21 | 64 | 29 | 0.023 | 7.1 | 1927-1921 |
| 80-85 | 5.9 | 23 | 51 | 21.5 | 0.308 | 4 | 1927-1915 |
| 85-90 | 6.3 | 22 | 53 | 20.2 | 0.204 | 2.9 | 1915-1909 |
